# Supplementary material for: Discovery and validation of molecular patterns and immune characteristics in the peripheral blood of ischemic stroke patients
Source: PeerJ. 2024 Apr 19;12:e17208. doi: 10.7717/peerj.17208 (PMC11034498; doi:10.7717/peerj.17208)
Supplement: Supplemental Information 18 [file peerj-12-17208-s018.xlsx]

## Sheet: ANTXR2
Block Type	96alum
Chemistry	SYBR_GREEN
Experiment File Name	CL GAPDH ANTXR2 5X.eds
Instrument Type	sds7300
Passive Reference	ROX
Sample Name	Target Name	Task	Reporter	Quencher	Cт	Cт Mean	Cт SD	ΔCт	ΔCт Mean	2^-ΔΔCт	Automatic Ct Threshold	Ct Threshold	Automatic Baseline	Baseline Start	Baseline End	Efficiency	Tm1	Tm2	Tm3
C1	GAPDH	UNKNOWN	SYBR	None	23.5785	23.5495	0.0487016				TRUE	0.103699	TRUE	3	19	1	82.7211
C1	GAPDH	UNKNOWN	SYBR	None	23.5766	23.5495	0.0487016				TRUE	0.103699	TRUE	3	19	1	82.8895
C1	GAPDH	UNKNOWN	SYBR	None	23.4932	23.5495	0.0487016				TRUE	0.103699	TRUE	3	19	1	82.8895
C2	GAPDH	UNKNOWN	SYBR	None	25.7026	25.7628	0.148102				TRUE	0.111476	TRUE	3	21	1	83.2261
C2	GAPDH	UNKNOWN	SYBR	None	25.9315	25.7628	0.148102				TRUE	0.111476	TRUE	3	22	1	83.2261
C2	GAPDH	UNKNOWN	SYBR	None	25.6542	25.7628	0.148102				TRUE	0.111476	TRUE	3	21	1	83.2261
C3	GAPDH	UNKNOWN	SYBR	None	25.8529	25.8249	0.11457				TRUE	0.111476	TRUE	3	22	1	83.0578
C3	GAPDH	UNKNOWN	SYBR	None	25.9229	25.8249	0.11457				TRUE	0.111476	TRUE	3	22	1	83.0578
C3	GAPDH	UNKNOWN	SYBR	None	25.699	25.8249	0.11457				TRUE	0.111476	TRUE	3	21	1	83.0578
C4	GAPDH	UNKNOWN	SYBR	None	25.8231	25.8044	0.10904				TRUE	0.111476	TRUE	3	22	1	82.8895
C4	GAPDH	UNKNOWN	SYBR	None	25.6872	25.8044	0.10904				TRUE	0.111476	TRUE	3	21	1	82.8895
C4	GAPDH	UNKNOWN	SYBR	None	25.9028	25.8044	0.10904				TRUE	0.111476	TRUE	3	22	1	82.8895
C5	GAPDH	UNKNOWN	SYBR	None	24.1144	24.0544	0.108296				TRUE	0.103699	TRUE	3	20	1	82.8895
C5	GAPDH	UNKNOWN	SYBR	None	24.1194	24.0544	0.108296				TRUE	0.103699	TRUE	3	20	1	83.0578
C5	GAPDH	UNKNOWN	SYBR	None	23.9293	24.0544	0.108296				TRUE	0.103699	TRUE	3	20	1	83.0578
IS1	GAPDH	UNKNOWN	SYBR	None	23.8406	23.6654	0.246294				TRUE	0.111476	TRUE	3	20	1	82.8895
IS1	GAPDH	UNKNOWN	SYBR	None	23.7719	23.6654	0.246294				TRUE	0.111476	TRUE	3	20	1	83.0578
IS1	GAPDH	UNKNOWN	SYBR	None	23.3838	23.6654	0.246294				TRUE	0.111476	TRUE	3	19	1	83.0578
IS2	GAPDH	UNKNOWN	SYBR	None	23.1256	23.025	0.138165				TRUE	0.111476	TRUE	3	19	1	83.0578
IS2	GAPDH	UNKNOWN	SYBR	None	23.0819	23.025	0.138165				TRUE	0.111476	TRUE	3	19	1	83.2261
IS2	GAPDH	UNKNOWN	SYBR	None	22.8675	23.025	0.138165				TRUE	0.111476	TRUE	3	19	1	83.2261
IS3	GAPDH	UNKNOWN	SYBR	None	22.7404	22.6054	0.246624				TRUE	0.111476	TRUE	3	19	1	83.2261
IS3	GAPDH	UNKNOWN	SYBR	None	22.7551	22.6054	0.246624				TRUE	0.111476	TRUE	3	19	1	83.3945
IS3	GAPDH	UNKNOWN	SYBR	None	22.3208	22.6054	0.246624				TRUE	0.111476	TRUE	3	18	1	83.3945
IS4	GAPDH	UNKNOWN	SYBR	None	23.3652	23.4138	0.082863				TRUE	0.111476	TRUE	3	19	1	83.2261
IS4	GAPDH	UNKNOWN	SYBR	None	23.5095	23.4138	0.082863				TRUE	0.111476	TRUE	3	19	1	83.2261
IS4	GAPDH	UNKNOWN	SYBR	None	23.3667	23.4138	0.082863				TRUE	0.111476	TRUE	3	19	1	83.2261
IS5	GAPDH	UNKNOWN	SYBR	None	23.6115	23.416	0.171859				TRUE	0.103699	TRUE	3	19	1	82.7211
IS5	GAPDH	UNKNOWN	SYBR	None	23.3478	23.416	0.171859				TRUE	0.103699	TRUE	3	19	1	82.7211
IS5	GAPDH	UNKNOWN	SYBR	None	23.2888	23.416	0.171859				TRUE	0.103699	TRUE	3	19	1	82.7211
C1	ANTXR2	UNKNOWN	SYBR	None	26.1439	26.0193	0.11671	2.46984	0	1	TRUE	0.0853824	TRUE	3	22	1	81.0377
C1	ANTXR2	UNKNOWN	SYBR	None	26.0014	26.0193	0.11671	2.46984	0	1	TRUE	0.0853824	TRUE	3	22	1	81.206
C1	ANTXR2	UNKNOWN	SYBR	None	25.9126	26.0193	0.11671	2.46984	0	1	TRUE	0.0853824	TRUE	3	22	1	81.206
C2	ANTXR2	UNKNOWN	SYBR	None	29.5664	29.5859	0.0531047	3.82314	1.3533	0.391396	TRUE	0.0867061	TRUE	3	26	1	81.3744
C2	ANTXR2	UNKNOWN	SYBR	None	29.646	29.5859	0.0531047	3.82314	1.3533	0.391396	TRUE	0.0867061	TRUE	3	26	1	81.5427
C2	ANTXR2	UNKNOWN	SYBR	None	29.5453	29.5859	0.0531047	3.82314	1.3533	0.391396	TRUE	0.0867061	TRUE	3	26	1	81.5427
C3	ANTXR2	UNKNOWN	SYBR	None	29.1746	29.4166	0.219848	3.59165	1.12181	0.459518	TRUE	0.0867061	TRUE	3	25	1	81.3744
C3	ANTXR2	UNKNOWN	SYBR	None	29.471	29.4166	0.219848	3.59165	1.12181	0.459518	TRUE	0.0867061	TRUE	3	26	1	81.3744
C3	ANTXR2	UNKNOWN	SYBR	None	29.6041	29.4166	0.219848	3.59165	1.12181	0.459518	TRUE	0.0867061	TRUE	3	26	1	81.3744
C4	ANTXR2	UNKNOWN	SYBR	None	29.747	29.5498	0.188604	3.74546	1.27562	0.413048	TRUE	0.0867061	TRUE	3	26	1	81.0377
C4	ANTXR2	UNKNOWN	SYBR	None	29.3712	29.5498	0.188604	3.74546	1.27562	0.413048	TRUE	0.0867061	TRUE	3	26	1	81.206
C4	ANTXR2	UNKNOWN	SYBR	None	29.5313	29.5498	0.188604	3.74546	1.27562	0.413048	TRUE	0.0867061	TRUE	3	26	1	81.206
C5	ANTXR2	UNKNOWN	SYBR	None	26.8797	26.7478	0.135754	2.69343	0.223585	0.856435	TRUE	0.0853824	TRUE	3	23	1	80.8693
C5	ANTXR2	UNKNOWN	SYBR	None	26.6085	26.7478	0.135754	2.69343	0.223585	0.856435	TRUE	0.0853824	TRUE	3	23	1	81.0377
C5	ANTXR2	UNKNOWN	SYBR	None	26.7553	26.7478	0.135754	2.69343	0.223585	0.856435	TRUE	0.0853824	TRUE	3	23	1	81.0377
IS1	ANTXR2	UNKNOWN	SYBR	None	25.9412	25.9411	0.0142566	2.27567	-0.194174	1.14407	TRUE	0.0867061	TRUE	3	22	1	81.206
IS1	ANTXR2	UNKNOWN	SYBR	None	25.9268	25.9411	0.0142566	2.27567	-0.194174	1.14407	TRUE	0.0867061	TRUE	3	22	1	81.206
IS1	ANTXR2	UNKNOWN	SYBR	None	25.9553	25.9411	0.0142566	2.27567	-0.194174	1.14407	TRUE	0.0867061	TRUE	3	22	1	81.206
IS2	ANTXR2	UNKNOWN	SYBR	None	26.0096	25.9502	0.0729876	2.92521	0.455372	0.729322	TRUE	0.0867061	TRUE	3	22	1	81.3744
IS2	ANTXR2	UNKNOWN	SYBR	None	25.8687	25.9502	0.0729876	2.92521	0.455372	0.729322	TRUE	0.0867061	TRUE	3	22	1	81.3744
IS2	ANTXR2	UNKNOWN	SYBR	None	25.9723	25.9502	0.0729876	2.92521	0.455372	0.729322	TRUE	0.0867061	TRUE	3	22	1	81.3744
IS3	ANTXR2	UNKNOWN	SYBR	None	25.3241	25.3929	0.0838751	2.78744	0.317595	0.802407	TRUE	0.0867061	TRUE	3	22	1	81.5427
IS3	ANTXR2	UNKNOWN	SYBR	None	25.4863	25.3929	0.0838751	2.78744	0.317595	0.802407	TRUE	0.0867061	TRUE	3	22	1	81.5427
IS3	ANTXR2	UNKNOWN	SYBR	None	25.3681	25.3929	0.0838751	2.78744	0.317595	0.802407	TRUE	0.0867061	TRUE	3	22	1	81.5427
IS4	ANTXR2	UNKNOWN	SYBR	None	26.9225	26.8174	0.116238	3.4036	0.93376	0.523492	TRUE	0.0867061	TRUE	3	23	1	81.5427
IS4	ANTXR2	UNKNOWN	SYBR	None	26.6926	26.8174	0.116238	3.4036	0.93376	0.523492	TRUE	0.0867061	TRUE	3	23	1	81.5427
IS4	ANTXR2	UNKNOWN	SYBR	None	26.8372	26.8174	0.116238	3.4036	0.93376	0.523492	TRUE	0.0867061	TRUE	3	23	1	81.5427
IS5	ANTXR2	UNKNOWN	SYBR	None	25.9579	25.8456	0.100625	2.42964	-0.040205	1.02826	TRUE	0.0853824	TRUE	3	22	1	81.206
IS5	ANTXR2	UNKNOWN	SYBR	None	25.8155	25.8456	0.100625	2.42964	-0.040205	1.02826	TRUE	0.0853824	TRUE	3	22	1	81.206
IS5	ANTXR2	UNKNOWN	SYBR	None	25.7636	25.8456	0.100625	2.42964	-0.040205	1.02826	TRUE	0.0853824	TRUE	3	22	1	81.206

## Sheet: BAZ2B
Block Type	96alum
Chemistry	SYBR_GREEN
Experiment File Name	CL GAPDH BAZ2B 5X.eds
Instrument Type	sds7300
Passive Reference	ROX
Sample Name	Target Name	Task	Reporter	Quencher	Cт	Cт Mean	Cт SD	ΔCт	ΔCт Mean	2^-ΔΔCт	Automatic Ct Threshold	Ct Threshold	Automatic Baseline	Baseline Start	Baseline End	Efficiency	Tm1	Tm2	Tm3
C1	GAPDH	UNKNOWN	SYBR	None	23.5785	23.5495	0.0487016				TRUE	0.103699	TRUE	3	19	1	82.7211
C1	GAPDH	UNKNOWN	SYBR	None	23.5766	23.5495	0.0487016				TRUE	0.103699	TRUE	3	19	1	82.8895
C1	GAPDH	UNKNOWN	SYBR	None	23.4932	23.5495	0.0487016				TRUE	0.103699	TRUE	3	19	1	82.8895
C2	GAPDH	UNKNOWN	SYBR	None	25.7026	25.7628	0.148102				TRUE	0.111476	TRUE	3	21	1	83.2261
C2	GAPDH	UNKNOWN	SYBR	None	25.9315	25.7628	0.148102				TRUE	0.111476	TRUE	3	22	1	83.2261
C2	GAPDH	UNKNOWN	SYBR	None	25.6542	25.7628	0.148102				TRUE	0.111476	TRUE	3	21	1	83.2261
C3	GAPDH	UNKNOWN	SYBR	None	25.8529	25.8249	0.11457				TRUE	0.111476	TRUE	3	22	1	83.0578
C3	GAPDH	UNKNOWN	SYBR	None	25.9229	25.8249	0.11457				TRUE	0.111476	TRUE	3	22	1	83.0578
C3	GAPDH	UNKNOWN	SYBR	None	25.699	25.8249	0.11457				TRUE	0.111476	TRUE	3	21	1	83.0578
C4	GAPDH	UNKNOWN	SYBR	None	25.8231	25.8044	0.10904				TRUE	0.111476	TRUE	3	22	1	82.8895
C4	GAPDH	UNKNOWN	SYBR	None	25.6872	25.8044	0.10904				TRUE	0.111476	TRUE	3	21	1	82.8895
C4	GAPDH	UNKNOWN	SYBR	None	25.9028	25.8044	0.10904				TRUE	0.111476	TRUE	3	22	1	82.8895
C5	GAPDH	UNKNOWN	SYBR	None	23.9237	23.8199	0.166497				TRUE	0.125733	TRUE	3	19	1	82.996
C5	GAPDH	UNKNOWN	SYBR	None	23.9083	23.8199	0.166497				TRUE	0.125733	TRUE	3	19	1	83.1607
C5	GAPDH	UNKNOWN	SYBR	None	23.6279	23.8199	0.166497				TRUE	0.125733	TRUE	3	19	1	83.3254
IS1	GAPDH	UNKNOWN	SYBR	None	23.8406	23.6654	0.246294				TRUE	0.111476	TRUE	3	20	1	82.8895
IS1	GAPDH	UNKNOWN	SYBR	None	23.7719	23.6654	0.246294				TRUE	0.111476	TRUE	3	20	1	83.0578
IS1	GAPDH	UNKNOWN	SYBR	None	23.3838	23.6654	0.246294				TRUE	0.111476	TRUE	3	19	1	83.0578
IS2	GAPDH	UNKNOWN	SYBR	None	23.1256	23.025	0.138165				TRUE	0.111476	TRUE	3	19	1	83.0578
IS2	GAPDH	UNKNOWN	SYBR	None	23.0819	23.025	0.138165				TRUE	0.111476	TRUE	3	19	1	83.2261
IS2	GAPDH	UNKNOWN	SYBR	None	22.8675	23.025	0.138165				TRUE	0.111476	TRUE	3	19	1	83.2261
IS3	GAPDH	UNKNOWN	SYBR	None	22.7404	22.6054	0.246624				TRUE	0.111476	TRUE	3	19	1	83.2261
IS3	GAPDH	UNKNOWN	SYBR	None	22.7551	22.6054	0.246624				TRUE	0.111476	TRUE	3	19	1	83.3945
IS3	GAPDH	UNKNOWN	SYBR	None	22.3208	22.6054	0.246624				TRUE	0.111476	TRUE	3	18	1	83.3945
IS4	GAPDH	UNKNOWN	SYBR	None	23.3652	23.4138	0.082863				TRUE	0.111476	TRUE	3	19	1	83.2261
IS4	GAPDH	UNKNOWN	SYBR	None	23.5095	23.4138	0.082863				TRUE	0.111476	TRUE	3	19	1	83.2261
IS4	GAPDH	UNKNOWN	SYBR	None	23.3667	23.4138	0.082863				TRUE	0.111476	TRUE	3	19	1	83.2261
IS5	GAPDH	UNKNOWN	SYBR	None	23.6115	23.416	0.171859				TRUE	0.103699	TRUE	3	19	1	82.7211
IS5	GAPDH	UNKNOWN	SYBR	None	23.3478	23.416	0.171859				TRUE	0.103699	TRUE	3	19	1	82.7211
IS5	GAPDH	UNKNOWN	SYBR	None	23.2888	23.416	0.171859				TRUE	0.103699	TRUE	3	19	1	82.7211
C1	BAZ2B	UNKNOWN	SYBR	None	29.4242	28.91	0.497869	5.36051	0	1	TRUE	0.115416	TRUE	3	25	1	82.7211
C1	BAZ2B	UNKNOWN	SYBR	None	28.8755	28.91	0.497869	5.36051	0	1	TRUE	0.115416	TRUE	3	24	1	82.7211
C1	BAZ2B	UNKNOWN	SYBR	None	28.4302	28.91	0.497869	5.36051	0	1	TRUE	0.115416	TRUE	3	24	1	82.7211
C2	BAZ2B	UNKNOWN	SYBR	None	32.8203	32.9832	0.417179	7.22049	1.85998	0.275481	TRUE	0.0999106	TRUE	3	26	1	83.0578
C2	BAZ2B	UNKNOWN	SYBR	None	32.6721	32.9832	0.417179	7.22049	1.85998	0.275481	TRUE	0.0999106	TRUE	3	27	1	83.0578
C2	BAZ2B	UNKNOWN	SYBR	None	33.4573	32.9832	0.417179	7.22049	1.85998	0.275481	TRUE	0.0999106	TRUE	3	28	1	82.8895
C3	BAZ2B	UNKNOWN	SYBR	None	33.4068	33.3511	0.354605	7.52623	2.16573	0.22287	TRUE	0.0999106	TRUE	3	28	1	82.8895
C3	BAZ2B	UNKNOWN	SYBR	None	32.972	33.3511	0.354605	7.52623	2.16573	0.22287	TRUE	0.0999106	TRUE	3	29	1	82.7211
C3	BAZ2B	UNKNOWN	SYBR	None	33.6747	33.3511	0.354605	7.52623	2.16573	0.22287	TRUE	0.0999106	TRUE	3	27	1	82.7211
C4	BAZ2B	UNKNOWN	SYBR	None	33.4653	33.8699	0.443509	8.06551	2.705	0.153361	TRUE	0.0999106	TRUE	3	29	1	82.5528
C4	BAZ2B	UNKNOWN	SYBR	None	33.8003	33.8699	0.443509	8.06551	2.705	0.153361	TRUE	0.0999106	TRUE	3	29	1	82.5528
C4	BAZ2B	UNKNOWN	SYBR	None	34.3441	33.8699	0.443509	8.06551	2.705	0.153361	TRUE	0.0999106	TRUE	3	28	1	82.5528
C5	BAZ2B	UNKNOWN	SYBR	None	30.3696	30.1477	0.200725	6.32777	0.967257	0.511477	TRUE	0.112364	TRUE	3	26	1	82.996
C5	BAZ2B	UNKNOWN	SYBR	None	29.9788	30.1477	0.200725	6.32777	0.967257	0.511477	TRUE	0.112364	TRUE	3	25	1	82.996
C5	BAZ2B	UNKNOWN	SYBR	None	30.0947	30.1477	0.200725	6.32777	0.967257	0.511477	TRUE	0.112364	TRUE	3	26	1	82.996
IS1	BAZ2B	UNKNOWN	SYBR	None	28.0489	28.3879	0.320762	4.72244	-0.638068	1.55624	TRUE	0.0999106	TRUE	3	24	1	82.5528
IS1	BAZ2B	UNKNOWN	SYBR	None	28.4281	28.3879	0.320762	4.72244	-0.638068	1.55624	TRUE	0.0999106	TRUE	3	24	1	82.3844
IS1	BAZ2B	UNKNOWN	SYBR	None	28.6866	28.3879	0.320762	4.72244	-0.638068	1.55624	TRUE	0.0999106	TRUE	3	24	1	82.3844
IS2	BAZ2B	UNKNOWN	SYBR	None	28.0021	28.4789	0.482341	5.45396	0.0934533	0.937277	TRUE	0.0999106	TRUE	3	24	1	82.8895
IS2	BAZ2B	UNKNOWN	SYBR	None	28.9666	28.4789	0.482341	5.45396	0.0934533	0.937277	TRUE	0.0999106	TRUE	3	25	1	82.7211
IS2	BAZ2B	UNKNOWN	SYBR	None	28.4682	28.4789	0.482341	5.45396	0.0934533	0.937277	TRUE	0.0999106	TRUE	3	24	1	82.7211
IS3	BAZ2B	UNKNOWN	SYBR	None	27.7379	27.8996	0.20965	5.29419	-0.0663158	1.04704	TRUE	0.0999106	TRUE	3	24	1	83.0578
IS3	BAZ2B	UNKNOWN	SYBR	None	27.8244	27.8996	0.20965	5.29419	-0.0663158	1.04704	TRUE	0.0999106	TRUE	3	24	1	82.8895
IS3	BAZ2B	UNKNOWN	SYBR	None	28.1365	27.8996	0.20965	5.29419	-0.0663158	1.04704	TRUE	0.0999106	TRUE	3	24	1	82.8895
IS4	BAZ2B	UNKNOWN	SYBR	None	28.1962	28.5281	0.399786	5.11432	-0.246194	1.18607	TRUE	0.0999106	TRUE	3	24	1	83.0578
IS4	BAZ2B	UNKNOWN	SYBR	None	28.4162	28.5281	0.399786	5.11432	-0.246194	1.18607	TRUE	0.0999106	TRUE	3	24	1	83.0578
IS4	BAZ2B	UNKNOWN	SYBR	None	28.9719	28.5281	0.399786	5.11432	-0.246194	1.18607	TRUE	0.0999106	TRUE	3	25	1	82.8895
IS5	BAZ2B	UNKNOWN	SYBR	None	28.5381	28.1421	0.346915	4.7261	-0.634408	1.5523	TRUE	0.115416	TRUE	3	24	1	82.5528
IS5	BAZ2B	UNKNOWN	SYBR	None	27.9965	28.1421	0.346915	4.7261	-0.634408	1.5523	TRUE	0.115416	TRUE	3	23	1	82.5528
IS5	BAZ2B	UNKNOWN	SYBR	None	27.8917	28.1421	0.346915	4.7261	-0.634408	1.5523	TRUE	0.115416	TRUE	3	23	1	82.5528

## Sheet: C5AR1
Block Type	96alum
Chemistry	SYBR_GREEN
Experiment File Name	CL GAPDH C5AR1-1 5X.eds
Passive Reference	ROX
Sample Name	Target Name	Task	Reporter	Quencher	Cт	Cт Mean	Cт SD	ΔCт	ΔΔCт	2^-ΔΔCт	Automatic Ct Threshold	Ct Threshold	Automatic Baseline	Baseline Start	Baseline End	Efficiency	Tm1	Tm2	Tm3	Comments
C1	GAPDH	UNKNOWN	SYBR	None	21.821	21.8647	0.054149				TRUE	0.0554741	TRUE	3	19	1	82.6
C1	GAPDH	UNKNOWN	SYBR	None	21.9253	21.8647	0.054149				TRUE	0.0554741	TRUE	3	19	1	82.6
C1	GAPDH	UNKNOWN	SYBR	None	21.8478	21.8647	0.054149				TRUE	0.0554741	TRUE	3	19	1	82.6
C2	GAPDH	UNKNOWN	SYBR	None	22.3515	22.298	0.0556624				TRUE	0.0554741	TRUE	3	19	1	82.9313
C2	GAPDH	UNKNOWN	SYBR	None	22.2404	22.298	0.0556624				TRUE	0.0554741	TRUE	3	19	1	82.9313
C2	GAPDH	UNKNOWN	SYBR	None	22.302	22.298	0.0556624				TRUE	0.0554741	TRUE	3	19	1	82.7657
C3	GAPDH	UNKNOWN	SYBR	None	23.105	23.1455	0.209552				TRUE	0.0554741	TRUE	3	20	1	82.7657
C3	GAPDH	UNKNOWN	SYBR	None	23.3723	23.1455	0.209552				TRUE	0.0554741	TRUE	3	20	1	82.9313
C3	GAPDH	UNKNOWN	SYBR	None	22.9591	23.1455	0.209552				TRUE	0.0554741	TRUE	3	20	1	82.9313
C4	GAPDH	UNKNOWN	SYBR	None	24.0167	24.0496	0.0892339				TRUE	0.0554741	TRUE	3	21	1	82.9313
C4	GAPDH	UNKNOWN	SYBR	None	24.1506	24.0496	0.0892339				TRUE	0.0554741	TRUE	3	21	1	82.9313
C4	GAPDH	UNKNOWN	SYBR	None	23.9814	24.0496	0.0892339				TRUE	0.0554741	TRUE	3	21	1	82.9313
C5	GAPDH	UNKNOWN	SYBR	None	23.9073	23.9091	0.0539428				TRUE	0.0554741	TRUE	3	21	1	82.7657
C5	GAPDH	UNKNOWN	SYBR	None	23.856	23.9091	0.0539428				TRUE	0.0554741	TRUE	3	21	1	82.9313
C5	GAPDH	UNKNOWN	SYBR	None	23.9639	23.9091	0.0539428				TRUE	0.0554741	TRUE	3	21	1	82.7657
IS1	GAPDH	UNKNOWN	SYBR	None	21.8347	21.7968	0.157385				TRUE	0.0554741	TRUE	3	19	1	82.4343
IS1	GAPDH	UNKNOWN	SYBR	None	21.9317	21.7968	0.157385				TRUE	0.0554741	TRUE	3	19	1	82.6
IS1	GAPDH	UNKNOWN	SYBR	None	21.6239	21.7968	0.157385				TRUE	0.0554741	TRUE	3	18	1	82.6
IS2	GAPDH	UNKNOWN	SYBR	None	20.9899	20.984	0.0771036				TRUE	0.0554741	TRUE	3	18	1	82.6
IS2	GAPDH	UNKNOWN	SYBR	None	21.058	20.984	0.0771036				TRUE	0.0554741	TRUE	3	18	1	82.7657
IS2	GAPDH	UNKNOWN	SYBR	None	20.9041	20.984	0.0771036				TRUE	0.0554741	TRUE	3	18	1	82.9313
IS3	GAPDH	UNKNOWN	SYBR	None	20.5884	20.5804	0.249567				TRUE	0.0554741	TRUE	3	17	1	82.6
IS3	GAPDH	UNKNOWN	SYBR	None	20.8258	20.5804	0.249567				TRUE	0.0554741	TRUE	3	18	1	82.7657
IS3	GAPDH	UNKNOWN	SYBR	None	20.3268	20.5804	0.249567				TRUE	0.0554741	TRUE	3	17	1	82.9313
IS4	GAPDH	UNKNOWN	SYBR	None	21.5836	21.6399	0.168985				TRUE	0.0554741	TRUE	3	18	1	82.7657
IS4	GAPDH	UNKNOWN	SYBR	None	21.8299	21.6399	0.168985				TRUE	0.0554741	TRUE	3	19	1	82.9313
IS4	GAPDH	UNKNOWN	SYBR	None	21.5063	21.6399	0.168985				TRUE	0.0554741	TRUE	3	18	1	82.9313
IS5	GAPDH	UNKNOWN	SYBR	None	22.1468	22.0638	0.071891				TRUE	0.0554741	TRUE	3	19	1	82.6
IS5	GAPDH	UNKNOWN	SYBR	None	22.0243	22.0638	0.071891				TRUE	0.0554741	TRUE	3	19	1	82.6
IS5	GAPDH	UNKNOWN	SYBR	None	22.0204	22.0638	0.071891				TRUE	0.0554741	TRUE	3	19	1	82.6
C1	C5AR1-1	UNKNOWN	SYBR	None	23.4196	23.342	0.0677394	1.47728	0.702927	0.614325	TRUE	0.0536224	TRUE	3	20	1	86.5761
C1	C5AR1-1	UNKNOWN	SYBR	None	23.2952	23.342	0.0677394	1.47728	0.702927	0.614325	TRUE	0.0536224	TRUE	3	20	1	86.4104
C1	C5AR1-1	UNKNOWN	SYBR	None	23.3111	23.342	0.0677394	1.47728	0.702927	0.614325	TRUE	0.0536224	TRUE	3	20	1	86.2448
C2	C5AR1-1	UNKNOWN	SYBR	None	24.3849	24.2822	0.108589	1.98423	1.20988	0.432305	TRUE	0.0536224	TRUE	3	21	1	86.7418
C2	C5AR1-1	UNKNOWN	SYBR	None	24.2932	24.2822	0.108589	1.98423	1.20988	0.432305	TRUE	0.0536224	TRUE	3	21	1	86.5761
C2	C5AR1-1	UNKNOWN	SYBR	None	24.1686	24.2822	0.108589	1.98423	1.20988	0.432305	TRUE	0.0536224	TRUE	3	21	1	86.4104
C3	C5AR1-1	UNKNOWN	SYBR	None	25.7334	25.5659	0.152578	2.42039	1.64604	0.319517	TRUE	0.0536224	TRUE	3	23	1	86.4104
C3	C5AR1-1	UNKNOWN	SYBR	None	25.4348	25.5659	0.152578	2.42039	1.64604	0.319517	TRUE	0.0536224	TRUE	3	22	1	86.4104
C3	C5AR1-1	UNKNOWN	SYBR	None	25.5295	25.5659	0.152578	2.42039	1.64604	0.319517	TRUE	0.0536224	TRUE	3	22	1	86.2448
C4	C5AR1-1	UNKNOWN	SYBR	None	25.8931	25.96	0.115569	1.91041	1.13605	0.455002	TRUE	0.0536224	TRUE	3	23	1	86.0791
C4	C5AR1-1	UNKNOWN	SYBR	None	26.0934	25.96	0.115569	1.91041	1.13605	0.455002	TRUE	0.0536224	TRUE	3	23	1	86.0791
C4	C5AR1-1	UNKNOWN	SYBR	None	25.8934	25.96	0.115569	1.91041	1.13605	0.455002	TRUE	0.0536224	TRUE	3	23	1	86.0791
C5	C5AR1-1	UNKNOWN	SYBR	None	26.4778	26.4376	0.0349459	2.5285	1.75414	0.296449	TRUE	0.0536224	TRUE	3	23	1	85.9134
C5	C5AR1-1	UNKNOWN	SYBR	None	26.4205	26.4376	0.0349459	2.5285	1.75414	0.296449	TRUE	0.0536224	TRUE	3	23	1	85.5821
C5	C5AR1-1	UNKNOWN	SYBR	None	26.4144	26.4376	0.0349459	2.5285	1.75414	0.296449	TRUE	0.0536224	TRUE	3	23	1	85.2507
IS1	C5AR1-1	UNKNOWN	SYBR	None	22.4306	22.5711	0.160241	0.774355	0	1	TRUE	0.0536224	TRUE	3	19	1	86.7418
IS1	C5AR1-1	UNKNOWN	SYBR	None	22.7456	22.5711	0.160241	0.774355	0	1	TRUE	0.0536224	TRUE	3	20	1	86.7418
IS1	C5AR1-1	UNKNOWN	SYBR	None	22.5371	22.5711	0.160241	0.774355	0	1	TRUE	0.0536224	TRUE	3	19	1	86.7418
IS2	C5AR1-1	UNKNOWN	SYBR	None	22.1693	22.0845	0.0975692	1.10046	0.326105	0.797687	TRUE	0.0536224	TRUE	3	19	1	86.7418
IS2	C5AR1-1	UNKNOWN	SYBR	None	21.9778	22.0845	0.0975692	1.10046	0.326105	0.797687	TRUE	0.0536224	TRUE	3	19	1	86.7418
IS2	C5AR1-1	UNKNOWN	SYBR	None	22.1063	22.0845	0.0975692	1.10046	0.326105	0.797687	TRUE	0.0536224	TRUE	3	19	1	86.7418
IS3	C5AR1-1	UNKNOWN	SYBR	None	20.9142	20.8765	0.0562326	0.296181	-0.478174	1.39298	TRUE	0.0536224	TRUE	3	18	1	86.7418
IS3	C5AR1-1	UNKNOWN	SYBR	None	20.9035	20.8765	0.0562326	0.296181	-0.478174	1.39298	TRUE	0.0536224	TRUE	3	18	1	86.7418
IS3	C5AR1-1	UNKNOWN	SYBR	None	20.8119	20.8765	0.0562326	0.296181	-0.478174	1.39298	TRUE	0.0536224	TRUE	3	18	1	86.7418
IS4	C5AR1-1	UNKNOWN	SYBR	None	22.7077	22.8084	0.124042	1.16853	0.394171	0.760927	TRUE	0.0536224	TRUE	3	20	1	86.7418
IS4	C5AR1-1	UNKNOWN	SYBR	None	22.7706	22.8084	0.124042	1.16853	0.394171	0.760927	TRUE	0.0536224	TRUE	3	20	1	86.7418
IS4	C5AR1-1	UNKNOWN	SYBR	None	22.947	22.8084	0.124042	1.16853	0.394171	0.760927	TRUE	0.0536224	TRUE	3	20	1	86.5761
IS5	C5AR1-1	UNKNOWN	SYBR	None	22.5664	22.6732	0.227139	0.609404	-0.164951	1.12113	TRUE	0.0536224	TRUE	3	19	1	86.2448
IS5	C5AR1-1	UNKNOWN	SYBR	None	22.9341	22.6732	0.227139	0.609404	-0.164951	1.12113	TRUE	0.0536224	TRUE	3	20	1	86.0791
IS5	C5AR1-1	UNKNOWN	SYBR	None	22.5192	22.6732	0.227139	0.609404	-0.164951	1.12113	TRUE	0.0536224	TRUE	3	19	1	85.9134

## Sheet: PDK4
Block Type	96alum
Chemistry	SYBR_GREEN
Experiment File Name	CL GAPDH PDK4-1 5X .eds
Passive Reference	ROX
Sample Name	Target Name	Task	Reporter	Quencher	Cт	Cт Mean	Cт SD	ΔCт	ΔΔCт	2^-ΔΔCт	Automatic Ct Threshold	Ct Threshold	Automatic Baseline	Baseline Start	Baseline End	Efficiency	Tm1	Tm2	Tm3
C1	GAPDH	UNKNOWN	SYBR	None	22.3807	22.3527	0.0406694				TRUE	0.0809149	TRUE	3	19	1	83.1779
C1	GAPDH	UNKNOWN	SYBR	None	22.3713	22.3527	0.0406694				TRUE	0.0809149	TRUE	3	19	1	83.1779
C1	GAPDH	UNKNOWN	SYBR	None	22.306	22.3527	0.0406694				TRUE	0.0809149	TRUE	3	19	1	83.1779
C2	GAPDH	UNKNOWN	SYBR	None	24.7615	24.7485	0.0339212				TRUE	0.0809149	TRUE	3	21	1	82.9945
C2	GAPDH	UNKNOWN	SYBR	None	24.7739	24.7485	0.0339212				TRUE	0.0809149	TRUE	3	21	1	83.1779
C2	GAPDH	UNKNOWN	SYBR	None	24.71	24.7485	0.0339212				TRUE	0.0809149	TRUE	3	21	1	83.1779
C3	GAPDH	UNKNOWN	SYBR	None	24.9653	24.9348	0.0453548				TRUE	0.0809149	TRUE	3	21	1	82.8111
C3	GAPDH	UNKNOWN	SYBR	None	24.9563	24.9348	0.0453548				TRUE	0.0809149	TRUE	3	21	1	82.9945
C3	GAPDH	UNKNOWN	SYBR	None	24.8827	24.9348	0.0453548				TRUE	0.0809149	TRUE	3	21	1	83.1779
C4	GAPDH	UNKNOWN	SYBR	None	24.8769	24.8591	0.0154546				TRUE	0.0809149	TRUE	3	21	1	82.6276
C4	GAPDH	UNKNOWN	SYBR	None	24.8501	24.8591	0.0154546				TRUE	0.0809149	TRUE	3	21	1	82.8111
C4	GAPDH	UNKNOWN	SYBR	None	24.8502	24.8591	0.0154546				TRUE	0.0809149	TRUE	3	21	1	82.9945
C5	GAPDH	UNKNOWN	SYBR	None	22.6859	22.6251	0.053105				TRUE	0.0809149	TRUE	3	19	1	82.9945
C5	GAPDH	UNKNOWN	SYBR	None	22.6018	22.6251	0.053105				TRUE	0.0809149	TRUE	3	19	1	82.9945
C5	GAPDH	UNKNOWN	SYBR	None	22.5877	22.6251	0.053105				TRUE	0.0809149	TRUE	3	19	1	82.9945
IS1	GAPDH	UNKNOWN	SYBR	None	22.7724	22.738	0.0366754				TRUE	0.0809149	TRUE	3	19	1	82.6276
IS1	GAPDH	UNKNOWN	SYBR	None	22.7422	22.738	0.0366754				TRUE	0.0809149	TRUE	3	19	1	82.6276
IS1	GAPDH	UNKNOWN	SYBR	None	22.6994	22.738	0.0366754				TRUE	0.0809149	TRUE	3	19	1	82.8111
IS2	GAPDH	UNKNOWN	SYBR	None	23.0265	22.9963	0.0534558				TRUE	0.0809149	TRUE	3	19	1	82.6276
IS2	GAPDH	UNKNOWN	SYBR	None	23.0278	22.9963	0.0534558				TRUE	0.0809149	TRUE	3	19	1	82.8111
IS2	GAPDH	UNKNOWN	SYBR	None	22.9346	22.9963	0.0534558				TRUE	0.0809149	TRUE	3	19	1	82.9945
IS3	GAPDH	UNKNOWN	SYBR	None	22.0389	22.0179	0.0296469				TRUE	0.0809149	TRUE	3	18	1	82.9945
IS3	GAPDH	UNKNOWN	SYBR	None	22.0309	22.0179	0.0296469				TRUE	0.0809149	TRUE	3	18	1	82.9945
IS3	GAPDH	UNKNOWN	SYBR	None	21.984	22.0179	0.0296469				TRUE	0.0809149	TRUE	3	18	1	83.1779
IS4	GAPDH	UNKNOWN	SYBR	None	22.7179	22.6119	0.0969801				TRUE	0.0809149	TRUE	3	19	1	82.4442
IS4	GAPDH	UNKNOWN	SYBR	None	22.5902	22.6119	0.0969801				TRUE	0.0809149	TRUE	3	19	1	82.6276
IS4	GAPDH	UNKNOWN	SYBR	None	22.5276	22.6119	0.0969801				TRUE	0.0809149	TRUE	3	19	1	82.6276
IS5	GAPDH	UNKNOWN	SYBR	None	22.3029	22.2045	0.103157				TRUE	0.0809149	TRUE	3	19	1	82.8111
IS5	GAPDH	UNKNOWN	SYBR	None	22.2134	22.2045	0.103157				TRUE	0.0809149	TRUE	3	19	1	82.8111
IS5	GAPDH	UNKNOWN	SYBR	None	22.0972	22.2045	0.103157				TRUE	0.0809149	TRUE	3	18	1	82.8111
C1	PDK4-1	UNKNOWN	SYBR	None	28.0108	27.769	0.366881	5.41628	1.23188	0.425763	TRUE	0.0511803	TRUE	3	25	1	81.3436
C1	PDK4-1	UNKNOWN	SYBR	None	27.9493	27.769	0.366881	5.41628	1.23188	0.425763	TRUE	0.0511803	TRUE	3	25	1	81.1602
C1	PDK4-1	UNKNOWN	SYBR	None	27.3468	27.769	0.366881	5.41628	1.23188	0.425763	TRUE	0.0511803	TRUE	3	24	1	81.3436
C2	PDK4-1	UNKNOWN	SYBR	None	30.6148	30.481	0.185903	5.73256	1.54816	0.341947	TRUE	0.0511803	TRUE	3	28	1	81.1602
C2	PDK4-1	UNKNOWN	SYBR	None	30.5595	30.481	0.185903	5.73256	1.54816	0.341947	TRUE	0.0511803	TRUE	3	28	1	81.1602
C2	PDK4-1	UNKNOWN	SYBR	None	30.2688	30.481	0.185903	5.73256	1.54816	0.341947	TRUE	0.0511803	TRUE	3	27	1	81.3436
C3	PDK4-1	UNKNOWN	SYBR	None	30.0436	30.2	0.265636	5.26528	1.08088	0.472741	TRUE	0.0511803	TRUE	3	27	1	80.9768
C3	PDK4-1	UNKNOWN	SYBR	None	30.0498	30.2	0.265636	5.26528	1.08088	0.472741	TRUE	0.0511803	TRUE	3	27	1	80.9768
C3	PDK4-1	UNKNOWN	SYBR	None	30.5068	30.2	0.265636	5.26528	1.08088	0.472741	TRUE	0.0511803	TRUE	3	28	1	80.9768
C4	PDK4-1	UNKNOWN	SYBR	None	29.0285	29.1466	0.179108	4.28757	0.103172	0.930984	TRUE	0.0511803	TRUE	3	26	1	80.9768
C4	PDK4-1	UNKNOWN	SYBR	None	29.3527	29.1466	0.179108	4.28757	0.103172	0.930984	TRUE	0.0511803	TRUE	3	26	1	80.9768
C4	PDK4-1	UNKNOWN	SYBR	None	29.0587	29.1466	0.179108	4.28757	0.103172	0.930984	TRUE	0.0511803	TRUE	3	26	1	80.9768
C5	PDK4-1	UNKNOWN	SYBR	None	27.7455	27.834	0.0791254	5.20888	1.02448	0.491589	TRUE	0.0511803	TRUE	3	25	1	81.3436
C5	PDK4-1	UNKNOWN	SYBR	None	27.8979	27.834	0.0791254	5.20888	1.02448	0.491589	TRUE	0.0511803	TRUE	3	25	1	81.3436
C5	PDK4-1	UNKNOWN	SYBR	None	27.8586	27.834	0.0791254	5.20888	1.02448	0.491589	TRUE	0.0511803	TRUE	3	25	1	81.3436
IS1	PDK4-1	UNKNOWN	SYBR	None	26.9089	26.9224	0.0308722	4.1844	0	1	TRUE	0.0511803	TRUE	3	24	1	81.3436
IS1	PDK4-1	UNKNOWN	SYBR	None	26.9577	26.9224	0.0308722	4.1844	0	1	TRUE	0.0511803	TRUE	3	24	1	81.3436
IS1	PDK4-1	UNKNOWN	SYBR	None	26.9005	26.9224	0.0308722	4.1844	0	1	TRUE	0.0511803	TRUE	3	24	1	81.3436
IS2	PDK4-1	UNKNOWN	SYBR	None	26.4018	26.3435	0.0602388	3.34716	-0.837246	1.78664	TRUE	0.0511803	TRUE	3	23	1	81.3436
IS2	PDK4-1	UNKNOWN	SYBR	None	26.3471	26.3435	0.0602388	3.34716	-0.837246	1.78664	TRUE	0.0511803	TRUE	3	23	1	81.3436
IS2	PDK4-1	UNKNOWN	SYBR	None	26.2815	26.3435	0.0602388	3.34716	-0.837246	1.78664	TRUE	0.0511803	TRUE	3	23	1	81.3436
IS3	PDK4-1	UNKNOWN	SYBR	None	26.2609	26.2126	0.0538571	4.19471	0.0103073	0.992881	TRUE	0.0511803	TRUE	3	23	1	81.3436
IS3	PDK4-1	UNKNOWN	SYBR	None	26.2223	26.2126	0.0538571	4.19471	0.0103073	0.992881	TRUE	0.0511803	TRUE	3	23	1	81.3436
IS3	PDK4-1	UNKNOWN	SYBR	None	26.1546	26.2126	0.0538571	4.19471	0.0103073	0.992881	TRUE	0.0511803	TRUE	3	23	1	81.3436
IS4	PDK4-1	UNKNOWN	SYBR	None	26.0568	26.0535	0.0527037	3.44159	-0.742815	1.67344	TRUE	0.0511803	TRUE	3	23	1	81.1602
IS4	PDK4-1	UNKNOWN	SYBR	None	25.9992	26.0535	0.0527037	3.44159	-0.742815	1.67344	TRUE	0.0511803	TRUE	3	23	1	81.1602
IS4	PDK4-1	UNKNOWN	SYBR	None	26.1045	26.0535	0.0527037	3.44159	-0.742815	1.67344	TRUE	0.0511803	TRUE	3	23	1	81.1602
IS5	PDK4-1	UNKNOWN	SYBR	None	25.9553	25.9048	0.0652248	3.70033	-0.484077	1.39869	TRUE	0.0511803	TRUE	3	23	1	81.3436
IS5	PDK4-1	UNKNOWN	SYBR	None	25.8312	25.9048	0.0652248	3.70033	-0.484077	1.39869	TRUE	0.0511803	TRUE	3	23	1	81.3436
IS5	PDK4-1	UNKNOWN	SYBR	None	25.928	25.9048	0.0652248	3.70033	-0.484077	1.39869	TRUE	0.0511803	TRUE	3	23	1	81.1602

## Sheet: PPIH
Block Type	96alum
Chemistry	SYBR_GREEN
Experiment File Name	CL GAPDH PPIH 5X.eds
Instrument Type	sds7300
Passive Reference	ROX
Sample Name	Target Name	Task	Reporter	Quencher	Cт	Cт Mean	Cт SD	ΔCт	ΔCт Mean	2^-ΔΔCт	Automatic Ct Threshold	Ct Threshold	Automatic Baseline	Baseline Start	Baseline End	Efficiency	Tm1	Tm2	Tm3
C1	GAPDH	UNKNOWN	SYBR	None	23.5785	23.5495	0.0487016				TRUE	0.103699	TRUE	3	19	1	82.7211
C1	GAPDH	UNKNOWN	SYBR	None	23.5766	23.5495	0.0487016				TRUE	0.103699	TRUE	3	19	1	82.8895
C1	GAPDH	UNKNOWN	SYBR	None	23.4932	23.5495	0.0487016				TRUE	0.103699	TRUE	3	19	1	82.8895
C2	GAPDH	UNKNOWN	SYBR	None	24.1144	24.0544	0.108296				TRUE	0.103699	TRUE	3	20	1	82.8895
C2	GAPDH	UNKNOWN	SYBR	None	24.1194	24.0544	0.108296				TRUE	0.103699	TRUE	3	20	1	83.0578
C2	GAPDH	UNKNOWN	SYBR	None	23.9293	24.0544	0.108296				TRUE	0.103699	TRUE	3	20	1	83.0578
C3	GAPDH	UNKNOWN	SYBR	None	25.6267	25.8319	0.177758				TRUE	0.157622	TRUE	3	21	1	82.7406
C3	GAPDH	UNKNOWN	SYBR	None	25.9313	25.8319	0.177758				TRUE	0.157622	TRUE	3	21	1	82.7406
C3	GAPDH	UNKNOWN	SYBR	None	25.9378	25.8319	0.177758				TRUE	0.157622	TRUE	3	21	1	82.5812
C4	GAPDH	UNKNOWN	SYBR	None	26.779	26.5476	0.228332				TRUE	0.105564	TRUE	3	22	1	82.7558
C4	GAPDH	UNKNOWN	SYBR	None	26.5412	26.5476	0.228332				TRUE	0.105564	TRUE	3	22	1	82.9221
C4	GAPDH	UNKNOWN	SYBR	None	26.3225	26.5476	0.228332				TRUE	0.105564	TRUE	3	22	1	82.9221
C5	GAPDH	UNKNOWN	SYBR	None	25.9696	25.6875	0.291632				TRUE	0.105564	TRUE	3	22	1	82.5894
C5	GAPDH	UNKNOWN	SYBR	None	25.7059	25.6875	0.291632				TRUE	0.105564	TRUE	3	22	1	82.7558
C5	GAPDH	UNKNOWN	SYBR	None	25.3872	25.6875	0.291632				TRUE	0.105564	TRUE	3	21	1	82.7558
IS1	GAPDH	UNKNOWN	SYBR	None	24.3447	24.2107	0.126822				TRUE	0.105564	TRUE	3	20	1	82.7558
IS1	GAPDH	UNKNOWN	SYBR	None	24.195	24.2107	0.126822				TRUE	0.105564	TRUE	3	20	1	82.7558
IS1	GAPDH	UNKNOWN	SYBR	None	24.0925	24.2107	0.126822				TRUE	0.105564	TRUE	3	20	1	82.9221
IS2	GAPDH	UNKNOWN	SYBR	None	23.6721	23.5119	0.175877				TRUE	0.105564	TRUE	3	19	1	82.9221
IS2	GAPDH	UNKNOWN	SYBR	None	23.5399	23.5119	0.175877				TRUE	0.105564	TRUE	3	19	1	83.0884
IS2	GAPDH	UNKNOWN	SYBR	None	23.3237	23.5119	0.175877				TRUE	0.105564	TRUE	3	19	1	83.0884
IS3	GAPDH	UNKNOWN	SYBR	None	23.3506	23.2502	0.128911				TRUE	0.105564	TRUE	3	19	1	83.0884
IS3	GAPDH	UNKNOWN	SYBR	None	23.295	23.2502	0.128911				TRUE	0.105564	TRUE	3	19	1	83.0884
IS3	GAPDH	UNKNOWN	SYBR	None	23.1048	23.2502	0.128911				TRUE	0.105564	TRUE	3	19	1	83.0884
IS4	GAPDH	UNKNOWN	SYBR	None	23.9399	23.8161	0.206188				TRUE	0.105564	TRUE	3	20	1	83.0884
IS4	GAPDH	UNKNOWN	SYBR	None	23.9303	23.8161	0.206188				TRUE	0.105564	TRUE	3	20	1	83.0884
IS4	GAPDH	UNKNOWN	SYBR	None	23.5781	23.8161	0.206188				TRUE	0.105564	TRUE	3	19	1	83.0884
IS5	GAPDH	UNKNOWN	SYBR	None	23.6115	23.416	0.171859				TRUE	0.103699	TRUE	3	19	1	82.7211
IS5	GAPDH	UNKNOWN	SYBR	None	23.3478	23.416	0.171859				TRUE	0.103699	TRUE	3	19	1	82.7211
IS5	GAPDH	UNKNOWN	SYBR	None	23.2888	23.416	0.171859				TRUE	0.103699	TRUE	3	19	1	82.7211
C1	PPIH	UNKNOWN	SYBR	None	27.9272	28.0511	0.196623	4.50168	0	1	TRUE	0.101492	TRUE	3	24	1	82.2161
C1	PPIH	UNKNOWN	SYBR	None	27.9483	28.0511	0.196623	4.50168	0	1	TRUE	0.101492	TRUE	3	24	1	82.2161
C1	PPIH	UNKNOWN	SYBR	None	28.2779	28.0511	0.196623	4.50168	0	1	TRUE	0.101492	TRUE	3	24	1	82.0477
C2	PPIH	UNKNOWN	SYBR	None	28.0095	28.1875	0.197232	4.13314	-0.368546	1.29105	TRUE	0.101492	TRUE	3	24	1	82.2161
C2	PPIH	UNKNOWN	SYBR	None	28.1535	28.1875	0.197232	4.13314	-0.368546	1.29105	TRUE	0.101492	TRUE	3	24	1	82.0477
C2	PPIH	UNKNOWN	SYBR	None	28.3995	28.1875	0.197232	4.13314	-0.368546	1.29105	TRUE	0.101492	TRUE	3	24	1	82.0477
C3	PPIH	UNKNOWN	SYBR	None	31.995	31.9935	0.0041861	6.16156	1.65988	0.316466	TRUE	0.173936	TRUE	3	27	1	81.9435
C3	PPIH	UNKNOWN	SYBR	None	31.9967	31.9935	0.0041861	6.16156	1.65988	0.316466	TRUE	0.173936	TRUE	3	27	1	81.9435
C3	PPIH	UNKNOWN	SYBR	None	31.9887	31.9935	0.0041861	6.16156	1.65988	0.316466	TRUE	0.173936	TRUE	3	27	1	81.7841
C4	PPIH	UNKNOWN	SYBR	None	31.8616	32.0973	0.244361	5.5497	1.04802	0.483633	TRUE	0.0827706	TRUE	3	28	1	82.4231
C4	PPIH	UNKNOWN	SYBR	None	32.0807	32.0973	0.244361	5.5497	1.04802	0.483633	TRUE	0.0827706	TRUE	3	28	1	82.4231
C4	PPIH	UNKNOWN	SYBR	None	32.3495	32.0973	0.244361	5.5497	1.04802	0.483633	TRUE	0.0827706	TRUE	3	29	1	82.4231
C5	PPIH	UNKNOWN	SYBR	None	30.8244	31.0364	0.235878	5.34888	0.847195	0.555865	TRUE	0.0827706	TRUE	3	27	1	82.2568
C5	PPIH	UNKNOWN	SYBR	None	31.2905	31.0364	0.235878	5.34888	0.847195	0.555865	TRUE	0.0827706	TRUE	3	28	1	82.2568
C5	PPIH	UNKNOWN	SYBR	None	30.9944	31.0364	0.235878	5.34888	0.847195	0.555865	TRUE	0.0827706	TRUE	3	27	1	82.2568
IS1	PPIH	UNKNOWN	SYBR	None	28.9599	29.0899	0.256348	4.8792	0.377516	0.769762	TRUE	0.0827706	TRUE	3	25	1	81.9241
IS1	PPIH	UNKNOWN	SYBR	None	28.9246	29.0899	0.256348	4.8792	0.377516	0.769762	TRUE	0.0827706	TRUE	3	25	1	81.9241
IS1	PPIH	UNKNOWN	SYBR	None	29.3852	29.0899	0.256348	4.8792	0.377516	0.769762	TRUE	0.0827706	TRUE	3	26	1	81.7578
IS2	PPIH	UNKNOWN	SYBR	None	28.3994	28.475	0.145306	4.9631	0.461412	0.726275	TRUE	0.0827706	TRUE	3	25	1	82.2568
IS2	PPIH	UNKNOWN	SYBR	None	28.383	28.475	0.145306	4.9631	0.461412	0.726275	TRUE	0.0827706	TRUE	3	25	1	82.2568
IS2	PPIH	UNKNOWN	SYBR	None	28.6425	28.475	0.145306	4.9631	0.461412	0.726275	TRUE	0.0827706	TRUE	3	25	1	82.2568
IS3	PPIH	UNKNOWN	SYBR	None	28.0243	28.2078	0.256666	4.95766	0.455973	0.729018	TRUE	0.0827706	TRUE	3	24	1	82.4231
IS3	PPIH	UNKNOWN	SYBR	None	28.0981	28.2078	0.256666	4.95766	0.455973	0.729018	TRUE	0.0827706	TRUE	3	24	1	82.4231
IS3	PPIH	UNKNOWN	SYBR	None	28.5011	28.2078	0.256666	4.95766	0.455973	0.729018	TRUE	0.0827706	TRUE	3	25	1	82.4231
IS4	PPIH	UNKNOWN	SYBR	None	28.3476	28.5192	0.186803	4.7031	0.201418	0.869695	TRUE	0.0827706	TRUE	3	25	1	82.5894
IS4	PPIH	UNKNOWN	SYBR	None	28.4918	28.5192	0.186803	4.7031	0.201418	0.869695	TRUE	0.0827706	TRUE	3	25	1	82.4231
IS4	PPIH	UNKNOWN	SYBR	None	28.7182	28.5192	0.186803	4.7031	0.201418	0.869695	TRUE	0.0827706	TRUE	3	25	1	82.4231
IS5	PPIH	UNKNOWN	SYBR	None	28.6019	28.7103	0.202573	5.29428	0.792593	0.577306	TRUE	0.101492	TRUE	3	25	1	82.2161
IS5	PPIH	UNKNOWN	SYBR	None	28.5849	28.7103	0.202573	5.29428	0.792593	0.577306	TRUE	0.101492	TRUE	3	25	1	82.2161
IS5	PPIH	UNKNOWN	SYBR	None	28.944	28.7103	0.202573	5.29428	0.792593	0.577306	TRUE	0.101492	TRUE	3	25	1	82.0477

## Sheet: STK3
Block Type	96alum
Chemistry	SYBR_GREEN
Experiment File Name	CL GAPDH STK3 5X.eds
Instrument Type	sds7300
Passive Reference	ROX
Sample Name	Target Name	Task	Reporter	Quencher	Cт	Cт Mean	Cт SD	ΔCт	ΔCт Mean	2^-ΔΔCт	Automatic Ct Threshold	Ct Threshold	Automatic Baseline	Baseline Start	Baseline End	Efficiency	Tm1	Tm2	Tm3
C1	GAPDH	UNKNOWN	SYBR	None	23.5785	23.5495	0.0487016				TRUE	0.103699	TRUE	3	19	1	82.7211
C1	GAPDH	UNKNOWN	SYBR	None	23.5766	23.5495	0.0487016				TRUE	0.103699	TRUE	3	19	1	82.8895
C1	GAPDH	UNKNOWN	SYBR	None	23.4932	23.5495	0.0487016				TRUE	0.103699	TRUE	3	19	1	82.8895
C2	GAPDH	UNKNOWN	SYBR	None	24.1144	24.0544	0.108296				TRUE	0.103699	TRUE	3	20	1	82.8895
C2	GAPDH	UNKNOWN	SYBR	None	24.1194	24.0544	0.108296				TRUE	0.103699	TRUE	3	20	1	83.0578
C2	GAPDH	UNKNOWN	SYBR	None	23.9293	24.0544	0.108296				TRUE	0.103699	TRUE	3	20	1	83.0578
C3	GAPDH	UNKNOWN	SYBR	None	26.6761	26.4643	0.264051				TRUE	0.105564	TRUE	3	22	1	82.9221
C3	GAPDH	UNKNOWN	SYBR	None	26.5483	26.4643	0.264051				TRUE	0.105564	TRUE	3	22	1	82.9221
C3	GAPDH	UNKNOWN	SYBR	None	26.1685	26.4643	0.264051				TRUE	0.105564	TRUE	3	22	1	83.0884
C4	GAPDH	UNKNOWN	SYBR	None	26.779	26.5476	0.228332				TRUE	0.105564	TRUE	3	22	1	82.7558
C4	GAPDH	UNKNOWN	SYBR	None	26.5412	26.5476	0.228332				TRUE	0.105564	TRUE	3	22	1	82.9221
C4	GAPDH	UNKNOWN	SYBR	None	26.3225	26.5476	0.228332				TRUE	0.105564	TRUE	3	22	1	82.9221
C5	GAPDH	UNKNOWN	SYBR	None	25.9696	25.6875	0.291632				TRUE	0.105564	TRUE	3	22	1	82.5894
C5	GAPDH	UNKNOWN	SYBR	None	25.7059	25.6875	0.291632				TRUE	0.105564	TRUE	3	22	1	82.7558
C5	GAPDH	UNKNOWN	SYBR	None	25.3872	25.6875	0.291632				TRUE	0.105564	TRUE	3	21	1	82.7558
IS1	GAPDH	UNKNOWN	SYBR	None	24.3447	24.2107	0.126822				TRUE	0.105564	TRUE	3	20	1	82.7558
IS1	GAPDH	UNKNOWN	SYBR	None	24.195	24.2107	0.126822				TRUE	0.105564	TRUE	3	20	1	82.7558
IS1	GAPDH	UNKNOWN	SYBR	None	24.0925	24.2107	0.126822				TRUE	0.105564	TRUE	3	20	1	82.9221
IS2	GAPDH	UNKNOWN	SYBR	None	23.6721	23.5119	0.175877				TRUE	0.105564	TRUE	3	19	1	82.9221
IS2	GAPDH	UNKNOWN	SYBR	None	23.5399	23.5119	0.175877				TRUE	0.105564	TRUE	3	19	1	83.0884
IS2	GAPDH	UNKNOWN	SYBR	None	23.3237	23.5119	0.175877				TRUE	0.105564	TRUE	3	19	1	83.0884
IS3	GAPDH	UNKNOWN	SYBR	None	23.3506	23.2502	0.128911				TRUE	0.105564	TRUE	3	19	1	83.0884
IS3	GAPDH	UNKNOWN	SYBR	None	23.295	23.2502	0.128911				TRUE	0.105564	TRUE	3	19	1	83.0884
IS3	GAPDH	UNKNOWN	SYBR	None	23.1048	23.2502	0.128911				TRUE	0.105564	TRUE	3	19	1	83.0884
IS4	GAPDH	UNKNOWN	SYBR	None	23.9399	23.8161	0.206188				TRUE	0.105564	TRUE	3	20	1	83.0884
IS4	GAPDH	UNKNOWN	SYBR	None	23.9303	23.8161	0.206188				TRUE	0.105564	TRUE	3	20	1	83.0884
IS4	GAPDH	UNKNOWN	SYBR	None	23.5781	23.8161	0.206188				TRUE	0.105564	TRUE	3	19	1	83.0884
IS5	GAPDH	UNKNOWN	SYBR	None	23.6115	23.416	0.171859				TRUE	0.103699	TRUE	3	19	1	82.7211
IS5	GAPDH	UNKNOWN	SYBR	None	23.3478	23.416	0.171859				TRUE	0.103699	TRUE	3	19	1	82.7211
IS5	GAPDH	UNKNOWN	SYBR	None	23.2888	23.416	0.171859				TRUE	0.103699	TRUE	3	19	1	82.7211
C1	STK3	UNKNOWN	SYBR	None	28.8899	29.0721	0.20532	5.52265	0	1	TRUE	0.0854052	TRUE	3	25	1	80.196
C1	STK3	UNKNOWN	SYBR	None	29.0318	29.0721	0.20532	5.52265	0	1	TRUE	0.0854052	TRUE	3	25	1	80.196
C1	STK3	UNKNOWN	SYBR	None	29.2946	29.0721	0.20532	5.52265	0	1	TRUE	0.0854052	TRUE	3	25	1	80.0276
C2	STK3	UNKNOWN	SYBR	None	29.1938	29.4313	0.22098	6.01531	0.492662	0.710712	TRUE	0.0854052	TRUE	3	25	1	80.0276
C2	STK3	UNKNOWN	SYBR	None	29.4693	29.4313	0.22098	6.01531	0.492662	0.710712	TRUE	0.0854052	TRUE	3	26	1	80.0276
C2	STK3	UNKNOWN	SYBR	None	29.6309	29.4313	0.22098	6.01531	0.492662	0.710712	TRUE	0.0854052	TRUE	3	26	1	79.8593
C3	STK3	UNKNOWN	SYBR	None	33.4665	33.3115	0.326909	6.84717	1.32452	0.399282	TRUE	0.104352	TRUE	3	29	1	80.4271
C3	STK3	UNKNOWN	SYBR	None	32.9359	33.3115	0.326909	6.84717	1.32452	0.399282	TRUE	0.104352	TRUE	3	29	1	80.2608
C3	STK3	UNKNOWN	SYBR	None	33.532	33.3115	0.326909	6.84717	1.32452	0.399282	TRUE	0.104352	TRUE	3	29	1	80.0945
C4	STK3	UNKNOWN	SYBR	None	33.7456	33.1773	0.49427	6.6297	1.10705	0.464242	TRUE	0.104352	TRUE	3	30	1	80.4271
C4	STK3	UNKNOWN	SYBR	None	32.8475	33.1773	0.49427	6.6297	1.10705	0.464242	TRUE	0.104352	TRUE	3	29	1	80.2608
C4	STK3	UNKNOWN	SYBR	None	32.9388	33.1773	0.49427	6.6297	1.10705	0.464242	TRUE	0.104352	TRUE	3	29	1	80.0945
C5	STK3	UNKNOWN	SYBR	None	33.8026	33.5897	0.278843	7.90222	2.37957	0.192167	TRUE	0.104352	TRUE	3	30	1	80.2608
C5	STK3	UNKNOWN	SYBR	None	33.6925	33.5897	0.278843	7.90222	2.37957	0.192167	TRUE	0.104352	TRUE	3	29	1	80.2608
C5	STK3	UNKNOWN	SYBR	None	33.2741	33.5897	0.278843	7.90222	2.37957	0.192167	TRUE	0.104352	TRUE	3	29	1	79.9281
IS1	STK3	UNKNOWN	SYBR	None	29.3671	29.5945	0.204532	5.38378	-0.13887	1.10104	TRUE	0.104352	TRUE	3	25	1	80.0945
IS1	STK3	UNKNOWN	SYBR	None	29.653	29.5945	0.204532	5.38378	-0.13887	1.10104	TRUE	0.104352	TRUE	3	26	1	80.0945
IS1	STK3	UNKNOWN	SYBR	None	29.7634	29.5945	0.204532	5.38378	-0.13887	1.10104	TRUE	0.104352	TRUE	3	26	1	79.9281
IS2	STK3	UNKNOWN	SYBR	None	28.9262	29.0963	0.147548	5.58438	0.0617332	0.958112	TRUE	0.104352	TRUE	3	25	1	80.2608
IS2	STK3	UNKNOWN	SYBR	None	29.173	29.0963	0.147548	5.58438	0.0617332	0.958112	TRUE	0.104352	TRUE	3	25	1	80.2608
IS2	STK3	UNKNOWN	SYBR	None	29.1896	29.0963	0.147548	5.58438	0.0617332	0.958112	TRUE	0.104352	TRUE	3	25	1	80.0945
IS3	STK3	UNKNOWN	SYBR	None	28.3727	28.4754	0.137846	5.22519	-0.297457	1.22898	TRUE	0.104352	TRUE	3	24	1	80.4271
IS3	STK3	UNKNOWN	SYBR	None	28.4213	28.4754	0.137846	5.22519	-0.297457	1.22898	TRUE	0.104352	TRUE	3	24	1	80.2608
IS3	STK3	UNKNOWN	SYBR	None	28.632	28.4754	0.137846	5.22519	-0.297457	1.22898	TRUE	0.104352	TRUE	3	24	1	80.0945
IS4	STK3	UNKNOWN	SYBR	None	29.5175	29.6557	0.250324	5.83957	0.316919	0.802782	TRUE	0.104352	TRUE	3	25	1	80.4271
IS4	STK3	UNKNOWN	SYBR	None	29.5048	29.6557	0.250324	5.83957	0.316919	0.802782	TRUE	0.104352	TRUE	3	25	1	80.2608
IS4	STK3	UNKNOWN	SYBR	None	29.9446	29.6557	0.250324	5.83957	0.316919	0.802782	TRUE	0.104352	TRUE	3	26	1	80.0945
IS5	STK3	UNKNOWN	SYBR	None	29.5294	29.7278	0.215589	5.67346	0.150808	0.900746	TRUE	0.0854052	TRUE	3	26	1	80.3643
IS5	STK3	UNKNOWN	SYBR	None	29.6968	29.7278	0.215589	5.67346	0.150808	0.900746	TRUE	0.0854052	TRUE	3	26	1	80.196
IS5	STK3	UNKNOWN	SYBR	None	29.9572	29.7278	0.215589	5.67346	0.150808	0.900746	TRUE	0.0854052	TRUE	3	26	1	80.0276
