# Supplementary material for: Discovery and validation of molecular patterns and immune characteristics in the peripheral blood of ischemic stroke patients
Source: PeerJ. 2024 Apr 19;12:e17208. doi: 10.7717/peerj.17208 (PMC11034498; doi:10.7717/peerj.17208)
Supplement: Supplemental Information 19 [file peerj-12-17208-s019.xlsx]

## Sheet: DATA
Control(C)			M/F	Age
1	0172128086	Lin Cong	F	40
2	0173087520	Qinfei He	M	32
3	0174002958	Xiaoying Liu	F	65
4	0174048744	Tao Wang	M	52
5	0174239086	Guomin Li	M	70
IS	ID
1	0002589100	Baolong Dou	M	33
2	0002588415	Baogang Li	M	51
3	0002581280	Xueshuang Cheng	F	40
4	0002578592	Guifen Li	F	74
5	0002581619	Chaoqing Zhu	M	64
